# Supplementary material for: Clinical features, functional consequences, and rescue pharmacology of missense GRID1 and GRID2 human variants
Source: PubMed Central journal article supplement (PMC10840383; doi:10.1093/hmg/ddad188), 2023-11-07
Supplement: grid_variants_supplemental_revised_10-26-2023_final_rev_ddad188.pdf [file grid_variants_supplemental_revised_10-26-2023_final_rev_ddad188.pdf]

# SUPPLEMENTAL MATERIAL

## Clinical features, functional consequences, and rescue pharmacology of missense *GRID1* and *GRID2* human variants

James P. Allen<sup>1,2,§</sup>, Kathryn B. Garber<sup>3,4,§</sup>, Riley Perszyk<sup>1</sup>, Cara T. Khayat<sup>5</sup>, Steven A. Kell<sup>1,6</sup>, Maki Kaneko<sup>7,8</sup>, Catherine Quindipan<sup>8</sup>, Sulagna Saitta<sup>9</sup>, Roger L. Ladda<sup>10</sup>, Stacy Hewson<sup>11</sup>, Michal Inbar-Feigenberg<sup>12</sup>, Chitra Prasad<sup>13</sup>, Asuri N. Prasad<sup>14</sup>, Leah Olewiler<sup>15</sup>, Weiyi Mu<sup>16</sup>, Liana S. Rosenthal<sup>17</sup>, Marcello Scala<sup>18,19</sup>, Pasquale Striano<sup>18,19</sup>, Federico Zara<sup>20</sup>, Tyler W McCulloch<sup>21</sup>, Robin-Tobias Jauss<sup>22</sup>, Johannes R. Lemke<sup>22</sup>, David M. MacLean<sup>21</sup>, Cheng Zhu<sup>5</sup>, Hongjie Yuan<sup>1</sup>, Scott J. Myers<sup>1,2</sup>, Stephen F. Traynelis<sup>1,2\*</sup>

<sup>1</sup> Dept. of Pharmacology and Chemical Biology, Emory University School of Medicine, Atlanta, GA 30322.

<sup>2</sup> Center for the Functional Evaluation of Rare Variants (CFERV), Emory University School of Medicine, Atlanta, GA 30322.

<sup>3</sup> Dept. of Human Genetics, Emory University School of Medicine, Atlanta GA 30322

<sup>4</sup> EGL Genetics, Tucker, GA 30084

<sup>5</sup> Dept. of Biomedical Engineering, Georgia Institute of Technology, Atlanta GA 30332

<sup>6</sup> Dept. of Chemistry, Emory University School of Medicine, Atlanta, GA 30322.

<sup>7</sup> Division of Genomic Medicine, Department of Pathology, Children's Hospital Los Angeles, Los Angeles, CA 90027.

<sup>8</sup> Center for Personalized Medicine, Children's Hospital Los Angeles, Los Angeles, CA 90027.

<sup>9</sup> Division of Clinical Genetics, Departments of Human Genetics, OBGYN and Pediatrics, David Geffen School of Medicine at UCLA, Los Angeles, CA 90095

<sup>10</sup> Division of Human Genetics, Department of Pediatrics, Penn State College of Medicine, Hershey, PA 17033

<sup>11</sup> Dept. of Genetic Counselling, The Hospital for Sick Children and Department of Molecular Genetics, University of Toronto, Toronto, ON, Canada M5G 1X8

<sup>12</sup> Division of Clinical & Metabolic Genetics, The Hospital for Sick Children and Pediatrics, University of Toronto, Toronto ON, Canada M5G 1X8

<sup>13</sup> Dept. of Pediatrics (Section of Genetics and Metabolism), Western University and Schulich School of Medicine and Dentistry, Children's Hospital LHSC, London, ON, Canada. N6A5W9

<sup>14</sup> Division of Pediatric Neurology, Department of Pediatrics and Clinical Neurological Sciences, Western University and Schulich School of Medicine and Dentistry, Children's Hospital LHSC, London, ON, Canada. N6A5W9

<sup>15</sup> Dept. of Pediatrics, Division of Medical Genetics, University of Mississippi Medical Center, Jackson, MS 39216

<sup>16</sup> Dept. of Genetic Medicine, Johns Hopkins University, Baltimore MD 21287

<sup>17</sup> Dept. of Neurology, Johns Hopkins University, Baltimore MD 21287

<sup>18</sup> Department of Neurosciences, Rehabilitation, Ophthalmology, Genetics, Maternal and Child Health, Università Degli Studi di Genova, Genoa, Italy

<sup>19</sup> Pediatric Neurology and Muscular Diseases Unit, IRCCS Istituto Giannina Gaslini, Genoa, Italy

<sup>20</sup> Medical Genetics Unit, IRCCS Istituto Giannina Gaslini, Genoa, Italy

<sup>21</sup> Dept. Pharmacology and Physiology, University of Rochester Medical Center, Rochester NY, 14642

<sup>22</sup> Institute of Human Genetics, University of Leipzig Medical Center, 04103 Leipzig, Germany.

§ Contributed equally to this work

\* Corresponding author

## Table of Contents

**Supplemental Table S1.** Gene-level tolerance to variation of *GRID1* and *GRID2* compared to other glutamate receptors

**Supplemental Table S2:** *GRID1* variants collected for this study and from the literature

**Supplemental Table S3:** *GRID2* Variants collected in this study and from the literature

**Supplemental Table S4:** *GRID1* missense variants in ClinVar

**Supplemental Table S5:** *GRID2* missense variants in ClinVar

**Supplemental Table S6.** Predicted percent occupancy of GluD1-Cbln2 salt bridge interactions

**Supplemental Table S7.** Predicted percent occupancy of GluD1-Cbln2 hydrogen bond interactions

**Supplemental Table S8.** Inhibitors of constitutively active GluD2 current

**Supplemental Figure S1.** Alignment of human and rat GluD1 and GluD2 protein sequences

**Supplemental Figure S2.** RMSD of GluD1-Cbln2 homology model across MD simulation frames

**Supplemental Figure S3.** Genotype of the GluD1 KO cell line.

**Supplemental Figure S4.** 3D MTR analysis of other *GRID1* and *GRID2* variants

**Supplemental Figure S5.** Flow cytometry validation of GluD1 and Cbln2 presence.

**Supplemental Figure S6.** Single-concentration screen of compounds on GluD2-T649A and GluD2-A654T in oocytes

**Supplemental Figure S7.** Allosteric interactions of D-serine and Ca<sup>2+</sup> in GluD2-T649A.

**Supplemental Data 1.** Models of GluD1, GluD2, and Cbln2

**Supplemental Data 2.** 3D MTR results of *GRID1*, *GRID2*, and the *GRID1/CBLN2* interaction

**Supplemental Table S1. Gene-level tolerance to variation of *GRID1* and *GRID2* compared to other glutamate receptors**

| Gene                       | RVIS Score            | RVIS Percentile     |
|----------------------------|-----------------------|---------------------|
| <i>GRIN2B</i>              | -2.7495               | 1.28%               |
| <i>GRIN2A</i>              | -2.404                | 1.96%               |
| <i>GRIA1</i>               | -2.1651               | 2.55%               |
| <b><u><i>GRID1</i></u></b> | <b><u>-1.7687</u></b> | <b><u>4.21%</u></b> |
| <i>GRIA4</i>               | -1.7162               | 4.57%               |
| <i>GRIK3</i>               | -1.6626               | 4.91%               |
| <i>GRIA3</i>               | -1.4335               | 5.49%               |
| <i>GRIN1</i>               | -1.4048               | 6.92%               |
| <i>GRIK2</i>               | -1.3401               | 7.78%               |
| <b><u><i>GRID2</i></u></b> | <b><u>-1.2628</u></b> | <b><u>8.77%</u></b> |
| <i>GRIA2</i>               | -1.1199               | 10.77%              |
| <i>GRIN2D</i>              | -1.0728               | 11.66%              |
| <i>GRIK4</i>               | -1.0141               | 12.96%              |
| <i>GRIK1</i>               | -0.9506               | 14.26%              |
| <i>GRIK5</i>               | -0.6905               | 21.25%              |
| <i>GRIN2C</i>              | 0.2666                | 61.98%              |
| <i>GRIN3A</i>              | 0.3998                | 67.64%              |
| <i>GRIN3B</i>              | 2.7801                | 98.85%              |

Residual Variation Intolerance Score (RVIS) scores for gene level intolerance (Petrovski et al., 2013) are presented. Lower scores reflect less tolerance to variation. *GRID1* and *GRID2* are within the 4.21% and 8.77% of RVIS scores for all genes. This indicates that these genes are highly intolerant to variation. These scores are close to other well-studied ionotropic glutamate receptors that have been implicated in neurological diseases such as *GRIN1*, *GRIN2A*, *GRIN2B*, and *GRIN2D*. All genes represented are members of the ionotropic glutamate receptor family (S. F. Traynelis et al., 2010). RVIS scores are based on gnomAD (ExAC v2) release 2.0 (accessed: March 15<sup>th</sup> 2017).

**Supplemental Table S2: *GRID1* variants collected for this study and from the literature**

| Nucleotide Change*    | Protein Change              | Domain | SIFT                       | PolyPhen                             | gnomAD AC | # of people | Zygosity                     | Inheritance                                                  | Phenotype                                                                                                                                                                                                                                                                                                                                         | Source          |
|-----------------------|-----------------------------|--------|----------------------------|--------------------------------------|-----------|-------------|------------------------------|--------------------------------------------------------------|---------------------------------------------------------------------------------------------------------------------------------------------------------------------------------------------------------------------------------------------------------------------------------------------------------------------------------------------------|-----------------|
| c.220C>T              | p.Gln74*                    | NTD    | NA                         | NA                                   | 0         | 2           | 2 Heterozygous               | Maternal                                                     | Pt. 1: Motor delays, intellectual disability, macrocephaly, hypotonia                                                                                                                                                                                                                                                                             | This study      |
| c.353G>A              | p.Arg118His                 | NTD    | deleterious low confidence | probably damaging                    | 2         | 1           | 1 Heterozygous               | Unknown                                                      | Seizure panel ordered. No specific clinical information provided.                                                                                                                                                                                                                                                                                 | This study      |
| c.359C>A              | p.Pro120Gln                 | NTD    | Tolerated                  | benign                               | 0         | 7           | 7 Heterozygous               | Pt 1, 3-6: Unknown, Pt 2: Maternal                           | Pt 1: Autism, Pt 2: Abnormal newborn screen, Pt. 3: Hereditary hemorrhagic telangiectasia, Pt. 4-6: Cholestasis                                                                                                                                                                                                                                   | This study      |
| c.379G>A              | p.Ala127Thr                 | NTD    | Tolerated                  | benign                               | 23        | 8           | 8 Heterozygous               | Pt. 1, 3-6: Unknown, Pt 2: Maternal                          | Pt. 1: Hypoplasia of cerebellar vermis, thinning of corpus callosum, hypotonia, motor and developmental delays, Pt. 2: Seizures, developmental delay, nystagmus, hypotonia, cardiac malformation, Pt. 3: Hemihypertrophy and abnormal pigmentation, Pt. 4: Hearing impairment, autism, Pt. 5: Usher syndrome, Pt. 6-7: Cholestasis                | This study      |
| c.407G>A              | p.Gly136Asp                 | NTD    | tolerated                  | benign                               | 14        | 8           | 8 Heterozygotes              | Pt 1: Unknown, Pt. 2: Paternal Pt. 3-7: Unknown              | Pt. 1: Optic atrophy, Pt. 2: developmental delay, hypotonia, seizures, brain abnormalities, cardiac malformation, Pt. 3: Hypermobility, joint dislocations, joint pain, Pt. 3: Wilson disease. Alternate molecular diagnosis. Pt. 5-7: Cholestasis                                                                                                | This study      |
| c.437C>T;<br>c.442C>T | p.Pro146Leu;<br>p.Arg148Cys | NTD    | Deleterious; tolerated     | Probably damaging; probably damaging | 0;3       | 1           | Compound heterozygous        | Maternal (c.437C>T); Paternal (c.442C>T)                     | Abnormality of neuronal migration/Malformation of cortical development. Parents with single heterozygous variants are healthy.                                                                                                                                                                                                                    | This study      |
| c.481C>T              | p.Arg161Cys                 | NTD    | deleterious                | benign                               | 0         | 3           | 1 Homozygous, 2 Heterozygous | Pt. 1: l allele paternal; mother not tested Pt. 2-3: Unknown | Pt. 1: Homozygote with scoliosis, hip problems joint pain. Alternate molecular diagnosis for presenting features. Pt. 2: Heterozygote with syndactyly, short stature. Pt. 3: heterozygote with cholestasis                                                                                                                                        | This study      |
| c.482G>A              | p.Arg161His                 | NTD    | tolerated low confidence   | benign                               | 4         | 6           | 3 Homozygous 3 Heterozygous  | Homozygotes inherited variant from each heterozygous parent  | Pt. 1: Homozygote with mild intellectual disability, spastic paraplegia, glaucoma, optic atrophy, Pt. 2: Homozygote with mild intellectual disability, spastic paraplegia, glaucoma, optic atrophy, Pt. 3: Homozygote with moderate intellectual disability, spastic paraplegia, glaucoma, blindness; Heterozygous parents and sibling unaffected | Ung et al. 2022 |
| c.496G>A              | p.Val166Ile                 | NTD    | tolerated                  | benign                               | 86        | 18          | Unknown                      | Unknown                                                      | Pt. 1: Intellectual disability, Pt. 2: Learning disorder, ADHD, anxiety, Pt. 3: Autism                                                                                                                                                                                                                                                            | This study      |
| c.499A>G              | p.Met167Val                 | NTD    | tolerated                  | benign                               | 9         | 2           | 2 Heterozygous               | Unknown                                                      | Clinical samples with unknown referring phenotype                                                                                                                                                                                                                                                                                                 | This study      |
| c.596A>G              | p.Lys199Arg                 | NTD    | tolerated                  | benign                               | 0         | 1           | 1 Heterozygous               | Unknown                                                      | Seizure-like activity and possible ataxia                                                                                                                                                                                                                                                                                                         | This study      |
| c.662G>A              | p.Arg221Gln                 | NTD    | tolerated                  | probably damaging                    | 7         | 5           | 5 Heterozygous               | Unknown                                                      | Pt. 1: Intellectual disability, Pt. 2: Developmental delay, Pt. 3: Inflammatory Bowel Disease, Pt. 4: Epilepsy, Pt. 5: Hemihypertrophy, capillary malformations                                                                                                                                                                                   | This study      |
| c.706G>T              | p.Ala236Ser                 | NTD    | deleterious                | probably damaging                    | 0         | 1           | 1 Heterozygous               | Unknown                                                      | Focal seizures                                                                                                                                                                                                                                                                                                                                    | This study      |
| c.857C>T              | p.Pro286Leu                 | NTD    | tolerated                  | probably damaging                    | 7         | 1           | 1 Heterozygous               | Unknown                                                      | Developmental delays, speech delay. This patient had a likely pathogenic variant in a different gene that is diagnostic.                                                                                                                                                                                                                          | This study      |
| c.899G>T              | p.Arg300Leu                 | NTD    | deleterious                | probably damaging                    | 0         | 1           | 1 Heterozygous               | Unknown                                                      | Intellectual disability                                                                                                                                                                                                                                                                                                                           | This study      |
| c.919G>A              | p.Asp307Asn                 | NTD    | tolerated                  | probably damaging                    | 5         | 1           | 1 Heterozygous               | Unknown                                                      | Epileptic encephalopathy, absence seizures, tonic-clonic seizures, ataxia                                                                                                                                                                                                                                                                         | This study      |
| c.1022G>A             | p.Arg341Gln                 | NTD    | tolerated                  | probably damaging                    | 0         | 1           | Homozygous                   | Unknown                                                      | obesity with insatiable appetite, mild to moderate intellectual disability, ADHD, marked aggression, anxiety, schizoaffective disorder, and parents with intellectual disability. Hypotonia in the newborn period and early infancy. Facial dysmorphism, congenital v shape scar, chubby face, extensive stretch marks and large hands and feet.  | This study      |
| c.1119C>A             | p.His373Gln                 | NTD    | tolerated                  | benign                               | 2         | 1           | 1 Heterozygous               | Unknown                                                      | Epilepsy. Alternate molecular diagnosis.                                                                                                                                                                                                                                                                                                          | This study      |
| c.1151G>A             | p.Arg384Gln                 | NTD    | tolerated                  | benign                               | 34        | 4           | 4 Heterozygous               | Unknown                                                      | Pt. 1: Optic atrophy, Pt. 2: Intellectual disability, spastic paraplegia, Pt. 3: Autism. Alternate molecular diagnosis, Pt. 4: Skeletal dysplasia with increased bone density                                                                                                                                                                     | This study      |
| c.1285C>A             | p.Pro429Thr                 | NTD-S1 | tolerated                  | benign                               | 8         | 1           | Homozygous                   | Unknown                                                      | Dev delay, febrile illness, hypotonia, feeding difficulties, abnormal MRI, breathing difficulties                                                                                                                                                                                                                                                 | This study      |

|                             |                             |        |                           |                      |       |         |                                            |                                                |                                                                                                                                                                                                                                                                                                                                                                                                                                                                                                                               |            |
|-----------------------------|-----------------------------|--------|---------------------------|----------------------|-------|---------|--------------------------------------------|------------------------------------------------|-------------------------------------------------------------------------------------------------------------------------------------------------------------------------------------------------------------------------------------------------------------------------------------------------------------------------------------------------------------------------------------------------------------------------------------------------------------------------------------------------------------------------------|------------|
| c.1339G>A                   | p.Glu447Lys                 | S1     | deleterious               | benign               | 0     | 1       | 1 Heterozygous                             | Unknown                                        | Myoclonic epilepsy                                                                                                                                                                                                                                                                                                                                                                                                                                                                                                            | This study |
| c.1348G>A                   | p.Val450Met                 | S1     | deleterious               | possibly damaging    | 13    | 7       | 7 Heterozygous                             | Pt 1: Paternal, Pt 2-6: Unknown                | Pt. 1: Autism, language and fine motor regression. Not found in similarly affected sibling, Pt. 2: Osteogenesis imperfecta, Pt. 3: Pectus excavatum and hyperflexibility, Pt. 4: Cholestasis. Had heterozygous Likely Pathogenic variant in a relevant gene with autosomal recessive inheritance., Pt. 5: Cholestasis, Pt. 6 Wilson disease                                                                                                                                                                                   | This study |
| c.1366A>C<br>;<br>c.2255C>T | p.Ile456Leu;<br>p.Thr752Met | S1; S2 | tolerated,<br>deleterious | benign;<br>uncertain | 0; 11 | 2;3     | 1 Compound Heterozygous,<br>1 Heterozygous | Maternal (I456L) and paternal (T752M); Unknown | Pt. 1: Autism, developmental delay, microcephaly, abnormal brain MRI. Parents with single variants are healthy                                                                                                                                                                                                                                                                                                                                                                                                                | This study |
| c.1808C>A                   | p.Ala603Asp                 | M1-M3  | deleterious               | benign               | 32    | 3       | 3 Heterozygous                             | Pt. 1: Unknown, Pt. 2: Paternal                | 2 probands, 1 parent. Pt. 1: Immunodeficiency; Alternate molecular diagnosis. Pt. 2: Global development delay, spastic quadriparesis, seizures, macrocephaly. Has Likely Pathogenic de novo variant in a different gene that is diagnostic.                                                                                                                                                                                                                                                                                   | This study |
| c.1811C>T                   | p.Thr604Ile                 | M1-M3  | deleterious               | possibly damaging    | 20    | 5       | 4 Heterozygous,<br>1 unknown               | Unknown                                        | Pt. 1: Schizencephaly and septo-optic dysplasia, Pt. 2: Motor delays, hypertonía, dystonic encephalopathy, Pt. 3: Generalized epilepsy, neonatal seizure, Pt. 4: Pierre Robin sequence, bulbar neurologic losses, Pt. 5: Severe hypotonia, inverted nipples, respiratory failure                                                                                                                                                                                                                                              | This study |
| c.1948G>A                   | p.Ala650Thr                 | M3     | deleterious               | probably damaging    | 1     | Unknown | Heterozygous                               | Unknown                                        | Schizophrenia                                                                                                                                                                                                                                                                                                                                                                                                                                                                                                                 | SCHEMA     |
| c.2050G>C                   | p.Asp684His                 | S2     | deleterious               | possibly damaging    | 0     | 1       | Homozygous                                 | Unknown                                        | recurrent bilateral otitis media, reactive airway disease, bilateral vesicoureteral reflux, hydronephrosis, unilateral atrophic kidney, left club foot and left arm amelia, stereotypies, developmentally appropriate                                                                                                                                                                                                                                                                                                         | This study |
| c.2120A>G                   | p.Glu707Gly                 | S2     | deleterious               | probably damaging    | 0     | 1       | Heterozygous                               | Unknown                                        | Epilepsy                                                                                                                                                                                                                                                                                                                                                                                                                                                                                                                      | This study |
| c.2146G>A                   | p.Gly716Arg                 | S2     | tolerated                 | benign               | 10    | 1       | Heterozygous                               | Unknown                                        | Developmental delay, seizures                                                                                                                                                                                                                                                                                                                                                                                                                                                                                                 | This study |
| c.2449G>A                   | p.Ala817Thr                 | S2-M4  | tolerated                 | benign               | 0     | 1       | Heterozygous                               | de novo                                        | Developmental delay, intellectual disability, abnormal behavior, neuropsychiatric features                                                                                                                                                                                                                                                                                                                                                                                                                                    | This study |
| c.2690C>T                   | p.Ser897Leu                 | CTD    | tolerated                 | probably damaging    | 1     | 2       | Heterozygous                               | Paternal                                       | Epilepsy, ADHD, learning disabilities, macrocephaly. Father also has epilepsy. Alternate molecular diagnosis segregated with epilepsy.                                                                                                                                                                                                                                                                                                                                                                                        | This study |
| c.2855C>T                   | p.Pro952Leu                 | CTD    | tolerated                 | probably damaging    | 23    | 5       | 5 Heterozygous                             | Unknown                                        | Pt. 1: Developmental delays, ADHD, and dysmorphic features, Pt. 2: Short stature, ptosis, pectus excavatum, developmental delays, small ears, Pt. 3: Parent of tested individual. Variant not in child., Pt. 4: Cholestasis, Pt. 5: Short limbs, hepatosplenomegaly, bone density abnormalities, dysmorphic features, atrophy of the corpus callosum, Pt. 2: Eye panel was ordered, no specific clinical info provided. 1 heterozygous pathogenic variant was found in a different gene with autosomal recessive inheritance. | This study |
| c.2950C>T                   | p.Pro984Ser                 | CTD    | tolerated                 | benign               | 31    | 2       | Heterozygous                               | Unknown                                        | Pt. 1: Epilepsy, Pt. 2: Cholestasis, Alternate molecular diagnosis                                                                                                                                                                                                                                                                                                                                                                                                                                                            | This study |

**Supplemental Table S3: GRID2 Variants collected in this study and from the literature**

| Nucleotide Change*                                                | Protein Consequence                                            | Domain | SIFT                       | PolyPhen          | gnomAD AC | # of people | Zygosity                 | Inheritance                | Phenotype                                                                                                                                                                                    | Source                      |
|-------------------------------------------------------------------|----------------------------------------------------------------|--------|----------------------------|-------------------|-----------|-------------|--------------------------|----------------------------|----------------------------------------------------------------------------------------------------------------------------------------------------------------------------------------------|-----------------------------|
| c.52T>C                                                           | p.Trp18Arg                                                     | SigPep | tolerated                  | benign            | 0         | 1           | Heterozygous             | Inherited                  | Ataxia. Proband has variants in <i>SPTBN2</i> and <i>WFS1</i>                                                                                                                                | Fogel et al., 2014          |
| c.210delT                                                         | p.Asp71Metfs*16                                                | NTD    | NA                         | NA                | 0         | 1           | Heterozygous             | <i>de novo</i>             | congenital hypothyroidism, hypotonia, joint hypermobility, developmental delay (speech and fine motor), conductive hearing loss, macrocephaly, clinodactyly, and distinctive facial features | Personal commun. §          |
| c.899G>A                                                          | p.Arg300His                                                    | NTD    | tolerated                  | possibly damaging | 9         | 1           | Heterozygous             | Unknown                    | adult-onset progressive cerebellar ataxia, parkinsonism, diplopia, dysphagia                                                                                                                 | This study                  |
| c.1945A>G                                                         | p.Thr649Ala                                                    | M3     | deleterious                | probably damaging | 0         | 1           | Heterozygous             | <i>de novo</i>             | cerebellar ataxia, dysarthria, strabismus, and significant cerebellar volume loss on MRI                                                                                                     | This study                  |
| c.1960G>A                                                         | p.Ala654Thr                                                    | M3     | deleterious                | probably damaging | 0         | 1           | Heterozygous             | <i>de novo</i>             | Congenital spinocerebellar ataxia, saccadic pursuit, nystagmus, cerebellar atrophy                                                                                                           | Coutelier et al 2015        |
| c.1961C>A                                                         | p.Ala654Asp                                                    | M3     | deleterious                | probably damaging | 0         | 1           | Heterozygous             | <i>de novo</i>             | Congenital Spinocerebellar ataxia, saccadic pursuit, nystagmus, cerebellar atrophy                                                                                                           | Coutelier et al., 2015      |
| c.1966C>G                                                         | p.Leu656Val                                                    | M3-S2  | deleterious                | probably damaging | 0         | 6           | Homozygous, Heterozygous | Semi-dominant              | slowly progressive cerebellar ataxia or congenital ataxia, Intellectual disability, oculomotor symptoms                                                                                      | Coutelier et al., 2015      |
| c.2128C>T                                                         | p.Arg710Trp                                                    | S2     | deleterious                | possibly damaging | 13        | 3           | Homozygous               | Inherited                  | Cerebellar atrophy, cognitive impairment, muscular hypotonia, poor speech, spinocerebellar ataxia; autosomal recessive 18                                                                    | Ali et al., 2017            |
| c.2921T>A                                                         | p.Phe974Tyr                                                    | CTD    | deleterious low confidence | possibly damaging | 304       | 2           | Heterozygous             | Maternal                   | Proband and parent. microcephaly, hypotonia, motor and speech delay, dysmorphic features, spastic gait. Had alternate molecular diagnosis.                                                   | This study                  |
| GRCh38: chr4:9293084-5-93092974                                   | Copy number variant GRID2 deletion                             | -      | NA                         | NA                | 0         | 1           | Heterozygous             | Unknown                    | Schizophrenia, autistic traits                                                                                                                                                               | Kushima et al., 2018        |
| GRCh38: chr4:9259006-8-92732357                                   | Copy number variants GRID2 deletion                            | -      | NA                         | NA                | 0         | 1           | Heterozygous             | Unknown                    | Schizophrenia                                                                                                                                                                                | Kushima et al., 2018        |
| GRCh37: chr4:9298131-3-93256907                                   | 276 kb deletion spanning exon 1                                | -      | NA                         | NA                | 0         | 1           | Heterozygous             | <i>de novo</i>             | Cerebellar ataxia, spastic paraplegia, frontotemporal dementia                                                                                                                               | Maier et al., 2014          |
| GRCh37: chr4:9342286-6-93754032                                   | p.Gly30_Glu81del<br>In-frame deletion exon 2                   | -      | NA                         | NA                | 0         | 1           | Homozygous               | Inherited                  | Cerebellar ataxia, hypotonia nystagmus                                                                                                                                                       | Van Schil et al., 2015      |
| GRCh37: chr4:93525000-94836000                                    | 1.3 Mb deletion on 4q22.1q22.2 (exons 3-16)                    | -      | NA                         | NA                | 0         | 2           | Homozygous               | Inherited                  | Movement disorders, ataxia, developmental delay                                                                                                                                              | Taghdiri et al., 2019       |
| GRCh37: chr4:93412943-93748082 (de novo), chr4:9348111-0-93531257 | Deletion of exon 2                                             | -      | NA                         | NA                | 0         | 1           | Compound heterozygous    | Inherited / <i>de novo</i> | Ataxia, tonic upgaze, nystagmus, developmental delay                                                                                                                                         | Hills et al., 2014          |
| GRCh37: chr4:9401984-2-94056765                                   | Deletion of exon 4                                             | -      | NA                         | NA                | 0         | 3           | Homozygous               | Inherited                  | Ataxia, tonic upgaze, nystagmus, developmental delay                                                                                                                                         | Hills et al., 2014          |
| GRCh37: chr4:9415358-9-94298037                                   | Deletions of exon 3 and 4                                      | -      | NA                         | NA                | 0         | 3           | Homozygous               | Inherited                  | Nystagmus, hypotonia, movement disorders, cerebellar ataxia, developmental delay                                                                                                             | Utine et al., 2013          |
| GRCh37: chr4:9347296-3-93639305                                   | 166-kb homozygous intragenic deletion at 4q22.1 →22.1 (exon 2) | -      | NA                         | NA                | 0         | 2           | Homozygous               | Inherited                  | Ataxia, Tonic upgaze, nystagmus, hypotonia, developmental delay                                                                                                                              | Veerapan diyan et al., 2017 |
| GRCh37: Chr4:943164-80-94471802-                                  | Deletion at 4q22.2 (Exon 9-13)                                 | -      | NA                         | NA                | 0         | 3           | Heterozygous             | Inherited                  | Cerebellar atrophy and ataxia, nystagmus, hypotonia                                                                                                                                          | This study                  |
| GRCh37: Chr4:941376-18-94159909                                   | Deletion 4q22.2 (exon 6-8)                                     | -      | NA                         | NA                | 0         | 3           | Heterozygous             | Inherited                  | Cerebellar atrophy and ataxia, nystagmus, hypotonia                                                                                                                                          | This study                  |

§ Personal Communication, Dr. Juvianee I. Estrada-Veras

**Supplemental Table S4: *GRID1* missense variants in ClinVar**

| Nucleotide Change* | Protein Change | Domain | SIFT                       | PolyPhen          | gnomAD | Phenotype                                                  | Accession    |
|--------------------|----------------|--------|----------------------------|-------------------|--------|------------------------------------------------------------|--------------|
| c.349C>G           | p.Gln117Glu    | NTD    | deleterious low confidence | possibly damaging | 0      | Inborn genetic diseases                                    | VCV002559081 |
| c.379G>A           | p.Ala127Thr    | NTD    | tolerated                  | possibly damaging | 23     | Inborn genetic diseases                                    | VCV002347288 |
| c.437C>T           | p.Pro146Leu    | NTD    | deleterious                | probably damaging | 0      | Malformation of cortical development, inherited (maternal) | VCV000208924 |
| c.442C>T           | p.Arg148Cys    | NTD    | tolerated                  | probably damaging | 3      | Malformation of cortical development, inherited (paternal) | VCV000208923 |
| c.482G>A           | p.Arg161His    | NTD    | tolerated                  | benign            | 4      | Inborn genetic diseases                                    | VCV002408589 |
| c.662G>A           | p.Arg221Gln    | NTD    | tolerated                  | probably damaging | 7      | Inborn genetic diseases                                    | VCV002389797 |
| c.673C>T           | p.Arg225Cys    | NTD    | deleterious                | probably damaging | 2      | Inborn genetic diseases                                    | VCV002265245 |
| c.836C>T           | p.Thr279Ile    | NTD    | tolerated                  | probably damaging | 1      | Inborn genetic diseases                                    | VCV002260749 |
| c.1151G>A          | p.Arg384Gln    | NTD    | tolerated                  | possibly damaging | 34     | Inborn genetic diseases                                    | VCV002341592 |
| c.1288A>G          | p.Met430Val    | S1     | tolerated                  | benign            | 0      | Unknown                                                    | VCV001279125 |
| c.1496C>A          | p.Thr499Asn    | S1     | tolerated                  | benign            | 2      | Inborn genetic diseases                                    | VCV002276933 |
| c.1585G>A          | p.Val529Ile    | S1     | deleterious                | probably damaging | 6319   | Unknown                                                    | VCV001249619 |
| c.1625G>C          | p.Gly542Ala    | S1     | tolerated                  | probably damaging | 5      | Inborn genetic diseases                                    | VCV002295122 |
| c.1639A>G          | p.Lys547Glu    | S1-M1  | deleterious                | possibly damaging | 4      | Inborn genetic diseases                                    | VCV002232535 |
| c.1642C>T          | p.Pro548Ser    | S1-M1  | deleterious                | benign            | 13     | Inborn genetic diseases                                    | VCV002309911 |
| c.1808C>A          | p.Ala603Asp    | M1-M3  | tolerated                  | benign            | 32     | Inborn genetic diseases                                    | VCV002385716 |
| c.1808C>T          | p.Ala603Val    | M1-M3  | tolerated                  | benign            | 8      | Inborn genetic diseases                                    | VCV002395011 |
| c.1873G>A          | p.Val625Met    | M1-M3  | tolerated                  | benign            | 10     | Inborn genetic diseases                                    | VCV002211380 |
| c.1911G>T          | p.Trp637Cys    | M3     | deleterious                | probably damaging | 2      | Inborn genetic diseases                                    | VCV002398275 |
| c.2146G>A          | p.Gly716Arg    | S2     | tolerated                  | benign            | 10     | Inborn genetic diseases                                    | VCV002410007 |
| c.2326C>T          | p.His776Tyr    | S2     | tolerated                  | probably damaging | 0      | Inborn genetic diseases                                    | VCV002340170 |
| c.2575C>T          | p.Arg859Trp    | CTD    | deleterious                | probably damaging | 8      | Inborn genetic diseases                                    | VCV002366264 |
| c.2597A>G          | p.Lys866Arg    | CTD    | tolerated                  | benign            | 0      | Inborn genetic diseases                                    | VCV002308905 |
| c.2984G>A          | p.Gly995Asp    | CTD    | tolerated                  | probably damaging | 0      | Inborn genetic diseases                                    | VCV002207898 |

Missense variants are named on the transcript NM\_017551.3; only inherited or germline variants included. Missense variants that are absent from gnomAD are red. ClinVar accessed 9-15-23.

**Supplemental Table S5. GRID2 missense variants in ClinVar**

| Nucleotide Change* | Protein Consequence | Domain         | SIFT        | PolyPhen          | gnomAD | Phenotype                                                                                                                                                             | Accession      |
|--------------------|---------------------|----------------|-------------|-------------------|--------|-----------------------------------------------------------------------------------------------------------------------------------------------------------------------|----------------|
| c.62C>A            | p.Ala21Glu          | Signal peptide | tolerated   | benign            | 0      | Inborn genetic disease                                                                                                                                                | VCV002278308   |
| c.62C>T            | p.Ala21Val          | Signal peptide | tolerated   | benign            | 36     | Unknown                                                                                                                                                               | VCV001419994.2 |
| c.96T>G            | p.Ile32Met          | NTD            | deleterious | probably damaging | 3      | Inborn genetic disease                                                                                                                                                | VCV002209248   |
| c.117G>T           | p.Lys39Asn          | NTD            | tolerated   | probably damaging | 3      | Inborn genetic disease                                                                                                                                                | VCV002262925   |
| c.121G>T           | p.Asp41Tyr          | NTD            | tolerated   | possibly damaging | 0      | Autosomal recessive spinocerebellar ataxia 18                                                                                                                         | VCV001031990   |
| c.203C>T           | p.Thr68Met          | NTD            | deleterious | probably damaging | 9982   | Unknown                                                                                                                                                               | VCV001321117   |
| c.212A>C           | p.Asp71Ala          | NTD            | tolerated   | probably damaging | 10     | Inborn genetic disease                                                                                                                                                | VCV002387891   |
| c.290T>C           | p.Ile97Thr          | NTD            | tolerated   | possibly damaging | 333    | Unknown                                                                                                                                                               | VCV000726497   |
| c.299C>T           | p.Thr100Met         | NTD            | tolerated   | benign            | 19     | Inborn genetic disease                                                                                                                                                | VCV001981186   |
| c.331G>A           | p.Ala111Thr         | NTD            | tolerated   | probably damaging | 3      | Unknown                                                                                                                                                               | VCV002096167   |
| c.334A>G           | p.Met112Val         | NTD            | deleterious | probably damaging | 0      | Inborn genetic disease                                                                                                                                                | VCV002237327   |
| c.355A>G           | p.Ile119Val         | NTD            | tolerated   | benign            | 1      | Inborn genetic disease                                                                                                                                                | VCV002361170   |
| c.387T>G           | p.Ser129Arg         | NTD            | tolerated   | probably damaging | 1      | Unknown                                                                                                                                                               | VCV002007522   |
| c.517G>C           | p.Asp173His         | NTD            | deleterious | probably damaging | 0      | Inborn genetic disease                                                                                                                                                | VCV002335198   |
| c.529G>A           | p.Asp177Asn         | NTD            | tolerated   | probably damaging | 9      | Unknown                                                                                                                                                               | VCV001900250   |
| c.577A>G           | p.Met193Val         | NTD            | tolerated   | benign            | 77     | Unknown                                                                                                                                                               | VCV002076785   |
| c.587C>A           | p.Ala196Glu         | NTD            | deleterious | possibly damaging | 12     | Unknown                                                                                                                                                               | VCV001331258   |
| c.614A>G           | p.Asn205Ser         | NTD            | tolerated   | benign            | 28     | Unknown                                                                                                                                                               | VCV002191914   |
| c.661A>C           | p.Asn221His         | NTD            | tolerated   | benign            | 1      | Unknown                                                                                                                                                               | VCV001925212   |
| c.671G>A           | p.Arg224Gln         | NTD            | tolerated   | probably damaging | 3      | Spinocerebellar ataxia; autosomal recessive 18, homozygous, inherited                                                                                                 | VCV000488523   |
| c.686G>A           | p.Arg229Gln         | NTD            | tolerated   | probably damaging | 1      | Inborn genetic disease                                                                                                                                                | VCV002221805   |
| c.799G>A           | p.Asp267Asn         | NTD            | deleterious | probably damaging | 7      | Inborn genetic disease                                                                                                                                                | VCV002388002   |
| c.806A>T           | p.Asp269Val         | NTD            | deleterious | probably damaging | 2      | Unknown                                                                                                                                                               | VCV001935299   |
| c.876G>C           | p.Gln292His         | NTD            | deleterious | benign            | 9      | Developmental delays, seizures, white matter abnormalities, microcephaly, truncal hypotonia, hypertonia of extremities, heterozygous                                  | VCV000500424   |
| c.899G>A           | p.Arg300His         | NTD            | deleterious | probably damaging | 9      | Unknown                                                                                                                                                               | VCV000430178   |
| c.994C>T           | p.Leu332Phe         | NTD            | tolerated   | probably damaging | 2      | Inborn genetic disease                                                                                                                                                | VCV002226159   |
| c.1099C>T          | p.Arg367Cys         | NTD            | deleterious | probably damaging | 1      | Unknown                                                                                                                                                               | VCV001932578   |
| c.1107G>A          | p.Met369Ile         | NTD            | tolerated   | possibly damaging | 0      | Unknown                                                                                                                                                               | VCV002094811   |
| c.1178A>G          | p.Asn393Ser         | NTD            | deleterious | probably damaging | 1      | not provided                                                                                                                                                          | VCV000426507   |
| c.1241G>A          | p.Arg414Gln         | NTD            | deleterious | probably damaging | 19     | Unknown                                                                                                                                                               | VCV001930621   |
| c.1331G>A          | p.Arg444His         | S1             | tolerated   | probably damaging | 4      | Unknown                                                                                                                                                               | VCV001897094   |
| c.1419T>A          | p.Asp473Glu         | S1             | deleterious | probably damaging | 10     | Child onset for dermatologic,endocrine, musculoskeletal,structural,neurologic Inborn genetic diseases/MR/ID/DD/Movement disorders, overgrowth,hypotonia, heterozygous | VCV000522090   |
| c.1468G>A          | p.Val490Ile         | S1             | tolerated   | benign            | 23682  | Unknown                                                                                                                                                               | VCV001267971   |
| c.1637G>C          | p.Gly546Ala         | S1             | tolerated   | probably damaging | 0      | Unknown                                                                                                                                                               | VCV002027227   |



|           |             |       |                            |                   |     |                                                                     |              |
|-----------|-------------|-------|----------------------------|-------------------|-----|---------------------------------------------------------------------|--------------|
| c.1658A>G | p.Glu553Gly | S1-M1 | tolerated                  | probably damaging | 1   | Autosomal recessive spinocerebellar ataxia 18, inherited (maternal) | VCV001027933 |
| c.1690C>T | p.Pro564Ser | S1-M1 | deleterious                | probably damaging | 0   | Unknown                                                             | VCV001363817 |
| c.1720G>T | p.Ala574Ser | M1    | tolerated                  | possibly damaging | 1   | Unknown                                                             | VCV001985697 |
| c.1775C>T | p.Pro592Leu | M1-M3 | deleterious                | possibly damaging | 33  | Inborn genetic disease                                              | VCV002351263 |
| c.1861G>A | p.Gly621Arg | M1-M3 | tolerated                  | probably damaging | 10  | Inborn genetic disease                                              | VCV002401795 |
| c.1936T>C | p.Ser646Pro | M3    | deleterious                | probably damaging | 0   | unknown                                                             | VCV000809640 |
| c.1945A>T | p.Thr649Ser | M3    | deleterious                | probably damaging | 0   | Unknown                                                             | VCV002574317 |
| c.1946C>T | p.Thr649Met | M3    | deleterious                | probably damaging | 22  | Unknown                                                             | VCV002053093 |
| c.1948G>C | p.Ala650Pro | M3    | deleterious                | probably damaging | 0   | Unknown                                                             | VCV001316539 |
| c.1949C>T | p.Ala650Val | M3    | deleterious                | probably damaging | 0   | Unknown                                                             | VCV001723717 |
| c.1961C>G | p.Ala654Gly | M3    | deleterious                | probably damaging | 0   | Inborn genetic disease                                              | VCV000985445 |
| c.1981A>T | p.Ile661Phe | M3-S2 | deleterious                | probably damaging | 96  | Unknown                                                             | VCV000751483 |
| c.2128C>T | p.Arg710Trp | S2    | deleterious                | probably damaging | 13  | Autosomal recessive spinocerebellar ataxia 18, inherited            | VCV000427806 |
| c.2138A>G | p.Asn713Ser | S2    | tolerated                  | benign            | 16  | Inborn genetic disease                                              | VCV002230609 |
| c.2141G>A | p.Arg714Gln | S2    | tolerated                  | probably damaging | 12  | Inborn genetic disease                                              | VCV002275090 |
| c.2218G>A | p.Val740Ile | S2    | deleterious                | benign            | 327 | Unknown                                                             | VCV000785104 |
| c.2226T>G | p.Asp742Glu | S2    | tolerated                  | probably damaging | 6   | Inborn genetic disease                                              | VCV002369200 |
| c.2302C>T | p.Arg768Trp | S2    | deleterious                | probably damaging | 0   | Unknown                                                             | VCV002162742 |
| c.2328T>G | p.His776Gln | S2    | tolerated                  | probably damaging | 2   | Unknown                                                             | VCV001950232 |
| c.2489G>C | p.Ser830Thr | S2-M4 | deleterious                | benign            | 12  | Unknown                                                             | VCV001991000 |
| c.2585G>A | p.Arg862Gln | CTD   | tolerated                  | probably damaging | 15  | Inborn genetic disease                                              | VCV002212100 |
| c.2609A>G | p.Lys870Arg | CTD   | deleterious low confidence | probably damaging | 0   | Inborn genetic disease                                              | VCV002352798 |
| c.2824C>T | p.Arg942Cys | CTD   | deleterious low confidence | probably damaging | 3   | Inborn genetic disease                                              | VCV002380744 |
| c.2825G>A | p.Arg942His | CTD   | deleterious low confidence | probably damaging | 7   | Unknown                                                             | VCV002190998 |
| c.2896A>G | p.Arg966Gly | CTD   | deleterious low confidence | probably damaging | 14  | Unknown                                                             | VCV002058283 |
| c.2921T>A | p.Phe974Tyr | CTD   | tolerated                  | probably damaging | 304 | Unknown                                                             | VCV002050505 |
| c.2975C>T | p.Thr992Ile | CTD   | deleterious low confidence | benign            | 12  | Unknown                                                             | VCV002180680 |
| c.2995A>G | p.Asn999Asp | CTD   | tolerated                  | benign            | 2   | Inborn genetic disease                                              | VCV002296698 |

Missense variants are named on the transcript NM\_001510.4; only inherited or germline variants included. Missense variants that are absent from gnomAD are red. ClinVar was accessed on 9-15-23.

**Supplemental Table S6. Predicted percent occupancy of GluD1-Cbln2 salt bridge interactions**

| GluD1   |           |       | Cbln2   |           |       | Percent occupancy |
|---------|-----------|-------|---------|-----------|-------|-------------------|
| Residue | Residue # | Chain | Residue | Residue # | Chain |                   |
| Glu     | 58        | H     | Arg     | 181       | F     | 100               |
| Asp     | 21        | H     | Lys     | 212       | F     | 100               |
| Glu     | 58        | H     | Arg     | 204       | D     | 99.5              |
| Arg     | 341       | H     | Asp     | 176       | D     | 99.5              |
| Arg     | 341       | G     | Asp     | 178       | A     | 99.5              |
| Asp     | 21        | G     | Lys     | 212       | B     | 97.2              |
| Lys     | 357       | H     | Glu     | 107       | F     | 95.8              |
| Lys     | 357       | G     | Glu     | 104       | B     | 60.5              |
| Glu     | 58        | G     | Arg     | 204       | A     | 47.4              |
| Lys     | 59        | G     | Glu     | 203       | A     | 24.7              |
| Lys     | 357       | G     | Glu     | 107       | B     | 20.5              |
| Arg     | 353       | H     | Glu     | 104       | F     | 0.93              |
| Arg     | 341       | H     | Asp     | 178       | D     | 0                 |
| Asp     | 21        | H     | His     | 103       | F     | 0                 |
| His     | 344       | G     | Glu     | 104       | B     | 0                 |

All predicted salt bridge interactions between GluD1 and Cbln2 during MD simulation. Percent occupancy calculated using "Salt Bridges" VMD plugin. Identical residue pairs from different chains are calculated separately. Charged residues within 4 Å distance are considered occupied salt bridges.

**Supplemental Table S7. Predicted percent occupancy of GluD1-Cbln2 hydrogen bond interactions**

| GluD1      |            |           |                |          | Cbln2      |            |           |                | Percent occupancy |
|------------|------------|-----------|----------------|----------|------------|------------|-----------|----------------|-------------------|
| Residue    | Residue #  | Side/Main | Donor/Acceptor | Chain    | Residue    | Residue #  | Side/Main | Donor/Acceptor |                   |
| <b>Arg</b> | <b>341</b> | <b>S</b>  | <b>D</b>       | <b>G</b> | <b>Asp</b> | <b>178</b> | <b>S</b>  | <b>A</b>       | <b>97.21</b>      |
| Glu        | 58         | S         | A              | H        | Arg        | 181        | S         | D              | 95.81             |
| Glu        | 58         | S         | A              | H        | Arg        | 204        | S         | D              | 95.35             |
| Arg        | 341        | S         | D              | H        | Asp        | 176        | S         | A              | 94.42             |
| Glu        | 58         | S         | A              | G        | Arg        | 204        | S         | D              | 87.91             |
| Glu        | 58         | S         | A              | H        | Tyr        | 153        | S         | D              | 77.68             |
| Asp        | 21         | S         | A              | H        | Lys        | 212        | S         | D              | 77.21             |
| Asp        | 21         | S         | A              | H        | Thr        | 101        | S         | D              | 69.77             |
| Ser        | 348        | S         | D              | H        | Glu        | 104        | S         | A              | 65.58             |
| Ser        | 345        | M         | D              | H        | Met        | 208        | M         | A              | 63.72             |
| Lys        | 357        | S         | D              | H        | Glu        | 107        | S         | A              | 58.14             |
| Asp        | 21         | S         | A              | G        | Lys        | 212        | S         | D              | 52.56             |
| Ser        | 348        | M         | D              | H        | Glu        | 104        | S         | A              | 51.16             |
| Arg        | 341        | S         | D              | H        | Asp        | 178        | M         | A              | 46.51             |
| Ser        | 345        | M         | D              | G        | Met        | 208        | M         | A              | 45.12             |
| Ser        | 345        | S         | D              | H        | Asn        | 102        | M         | A              | 43.26             |
| Asp        | 21         | S         | A              | G        | Asn        | 102        | S         | D              | 41.4              |
| His        | 344        | S         | D              | G        | Glu        | 104        | S         | A              | 41.4              |
| Lys        | 357        | S         | D              | G        | Glu        | 104        | S         | A              | 35.95             |
| Asn        | 360        | S         | D              | H        | Glu        | 107        | S         | A              | 34.42             |
| Trp        | 343        | M         | A              | G        | Asn        | 154        | S         | D              | 30.7              |
| Ser        | 345        | S         | D              | G        | Asn        | 102        | M         | A              | 30.23             |
| Asp        | 21         | S         | A              | H        | Asn        | 102        | M         | D              | 26.05             |
| Met        | 346        | M         | A              | H        | Glu        | 104        | M         | D              | 24.19             |
| Asp        | 340        | M         | A              | H        | Arg        | 155        | S         | D              | 23.26             |
| Trp        | 343        | M         | D              | H        | Tyr        | 153        | M         | A              | 22.79             |
| Asp        | 21         | S         | A              | G        | Tyr        | 213        | S         | D              | 20                |
| Met        | 346        | M         | A              | G        | Glu        | 104        | M         | D              | 19.53             |
| Ala        | 20         | M         | D              | G        | Gln        | 159        | S         | A              | 17.67             |

|     |     |   |   |   |     |     |   |   |       |
|-----|-----|---|---|---|-----|-----|---|---|-------|
| Trp | 343 | M | D | G | Asn | 154 | S | A | 14.88 |
| Asn | 360 | S | D | G | Glu | 104 | S | A | 14.88 |
| Lys | 59  | S | D | G | Glu | 203 | S | A | 14.88 |
| Lys | 357 | S | D | G | Glu | 107 | S | A | 13.02 |
| Ser | 345 | S | D | G | Met | 208 | M | A | 12.56 |
| Arg | 341 | S | D | G | Asp | 178 | M | A | 10.7  |
| Ser | 348 | S | A | H | His | 103 | S | D | 9.3   |
| Ala | 20  | M | D | G | Glu | 203 | S | A | 7.44  |
| Gln | 85  | M | A | H | His | 103 | S | D | 4.65  |
| Asp | 21  | M | A | G | Tyr | 153 | S | D | 3.26  |
| Ala | 20  | M | D | G | Ser | 171 | S | A | 2.79  |
| Ala | 20  | M | A | G | Asn | 102 | S | D | 2.79  |
| Ser | 348 | S | A | G | His | 103 | S | D | 2.33  |
| Arg | 341 | M | A | G | Arg | 155 | M | D | 2.33  |
| Asp | 53  | S | A | G | Gln | 177 | S | D | 1.86  |
| Met | 346 | M | A | G | His | 103 | S | D | 0.93  |
| Ala | 20  | M | D | H | Ser | 100 | M | A | 0.93  |
| Arg | 353 | S | D | H | Glu | 104 | S | A | 0.93  |
| Asp | 53  | M | A | G | Gln | 177 | S | D | 0.47  |
| Asp | 52  | S | A | G | Gln | 177 | S | D | 0.47  |
| Asp | 53  | S | A | H | Gln | 156 | S | D | 0.47  |
| Asp | 53  | S | A | H | Gln | 177 | S | D | 0.47  |

All predicted hydrogen bonding interactions between GluD1 and Cbln2 during MD simulation. Percent occupancy was calculated using the VMD "HBonds" plugin. Identical residue pairs from different chains are calculated separately. Donor-Acceptor distance was set to 3 Å and the hydrogen bonding angle cutoff was set to 20°. Whether the hydrogen bond interaction is occurring in a side/main chain is indicated with "S" or "M" for each of GluD1 and Cbln2. Hydrogen bond donors/acceptors are indicated with "D" or "A".

**Supplemental Table S8. Inhibitors of constitutively active GluD2 current**

|                                        | <b>T649A IC<sub>50</sub><br/>[95% CI] (n)</b> | <b>A654T IC<sub>50</sub><br/>[95% CI] (n)</b> | <b>Fold-shift</b> |
|----------------------------------------|-----------------------------------------------|-----------------------------------------------|-------------------|
| <b>D-Serine (1 mM Ca<sup>2+</sup>)</b> | 0.69 mM<br>[0.68,0.70] (5)                    | 1.5 mM<br>[1.4, 1.6] (7)                      | 2.2               |
| <b>Glycine</b>                         | 0.24 mM<br>[0.18,0.29] (11)                   | 1.0 mM<br>[0.94,1.2] (8)                      | 4.4               |
| <b>D-Alanine</b>                       | 1.3 mM<br>[0.44, 1.7] (9)                     | 1.6 mM<br>[1.3, 1.8] (12)                     | 1.2               |
| <b>L-Aspartic Acid</b>                 | 0.27 mM<br>[0.065, 0.3] (10)                  | 5.0 mM<br>[0.34, 17] (5)                      | 19                |

Data are mean [95% CI Lower, Upper], with number of oocytes in parentheses (n). Fold-shift is IC<sub>50</sub> A654T/IC<sub>50</sub> T649A.

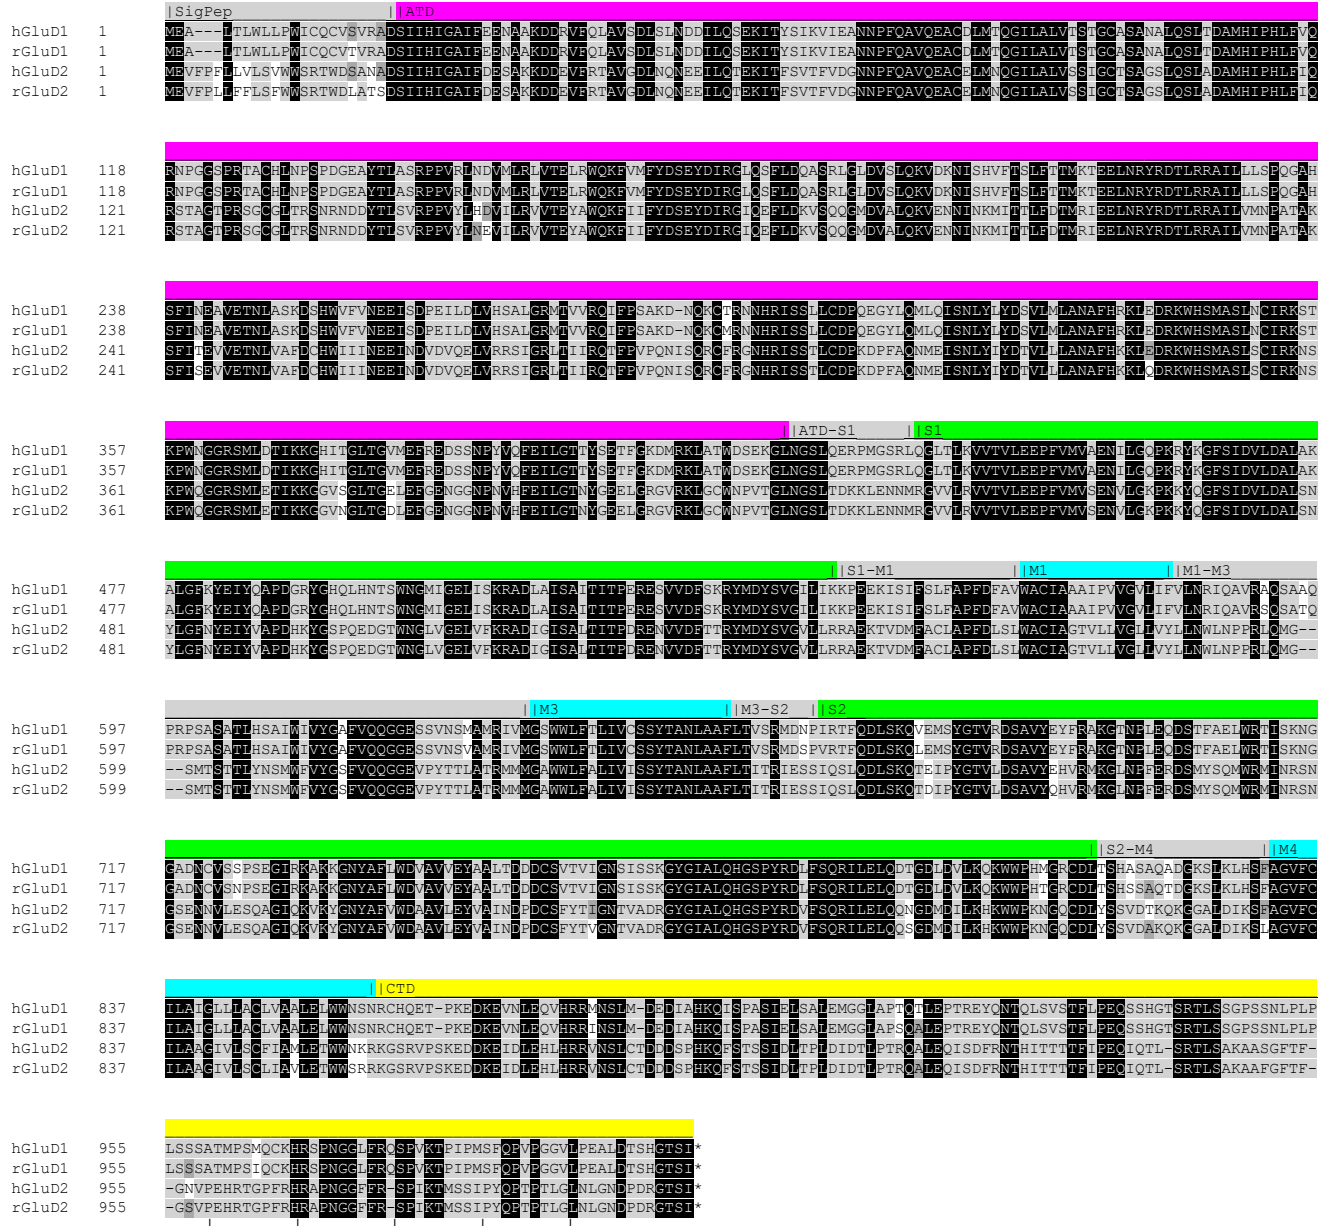

**Supplemental Figure S1. Alignment of human and rat GluD1 and GluD2 protein sequences.** Alignments of human GluD1 (NP\_060021.1), rat GluD1 (NP\_077354.1), human GluD2 (NP\_001501.2), and rat GluD2 (NP\_077355.1). Black: identical residues in all. Dark background indicates identical residues in all GluD1 and GluD2 (rat and human). Light gray background indicates identical residues in human GluD1 and GluD2, or in rat GluD1 and GluD2. Alignments made using Clustal Omega (EMBL-EBI). Domains based on RCSB PDB ID 6KSS (Burada et al. 2020).

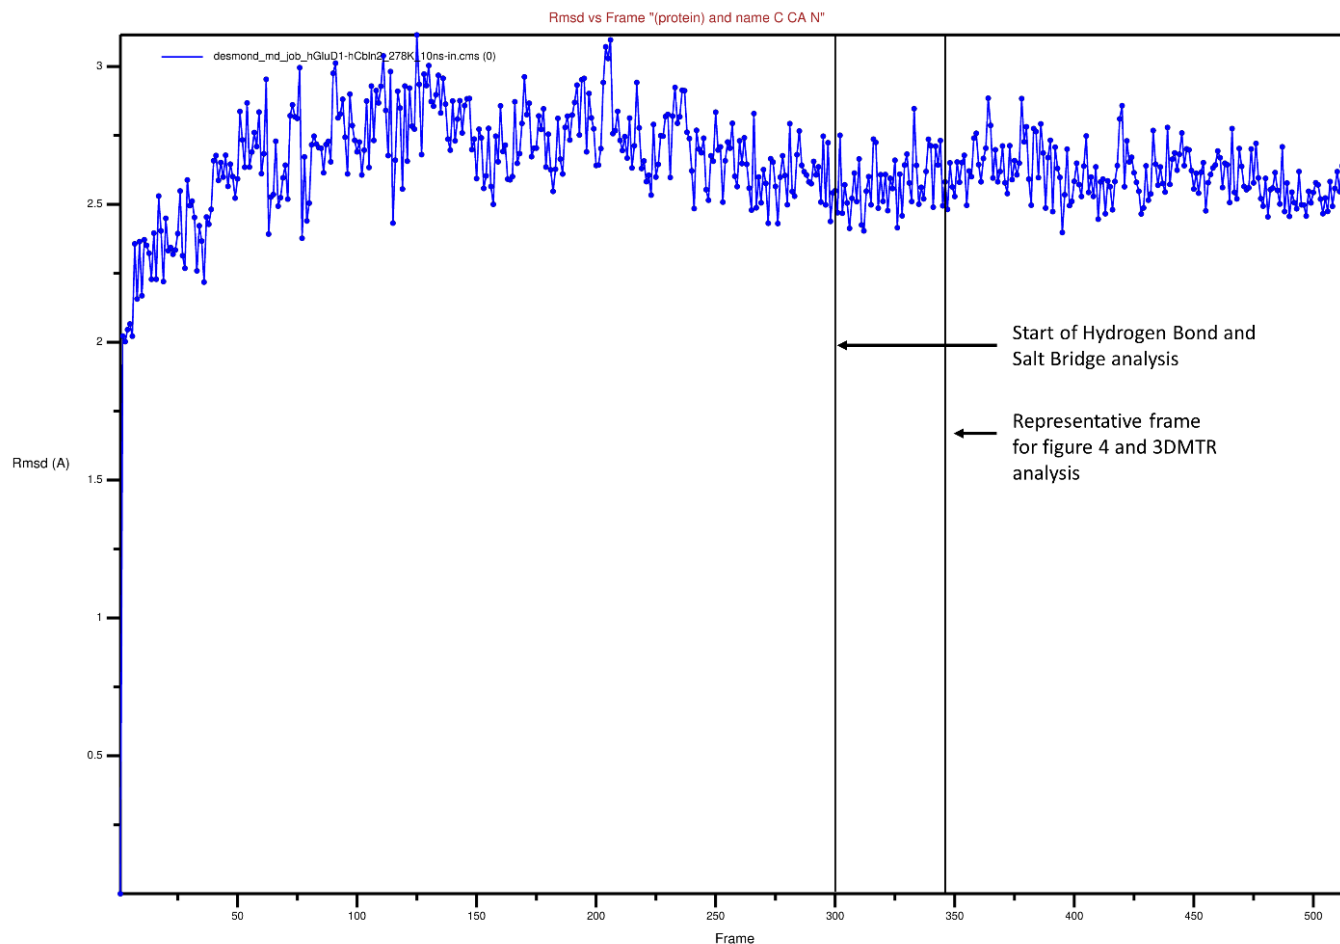

**Supplemental Figure S2. RMSD of GluD1-Cbln2 homology model across MD simulation frames.** Plot was generated using the VMD RMSD Trajectory tool. Salt bridge and hydrogen bond percent occupancy analysis was performed after RMSD stabilization (Table S6, S7). The representative frame used to generate Figure 4 of the main text is indicated.

A

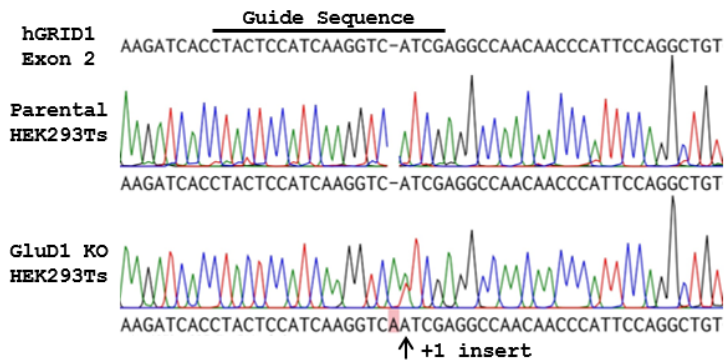

B

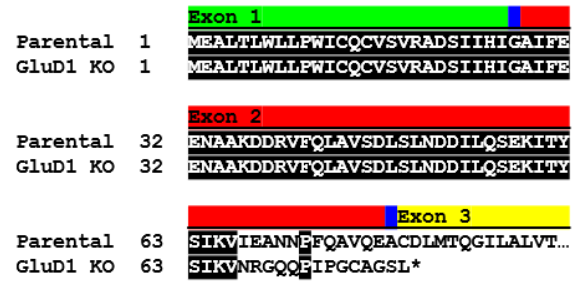

**Supplemental Figure S3. Genotype of the GluD1 KO cell line.** (A) Sequence alignment and Sanger sequencing traces of the parental HEK293T and GluD1 KO cell lines demonstrating a +1 A/T insertion into the second exon of the *GRID1* gene immediately following the red highlighted base. (B) The predicted *GRID1* gene product in the parental (wild type) and GluD1 KO cell lines. The +1 insertion induces frame shift at amino acid 67 of the GluD1 polypeptide chain, producing a mutant C-terminal sequence before prematurely terminating within exon 3. A black background indicates identical residues in both proteins.



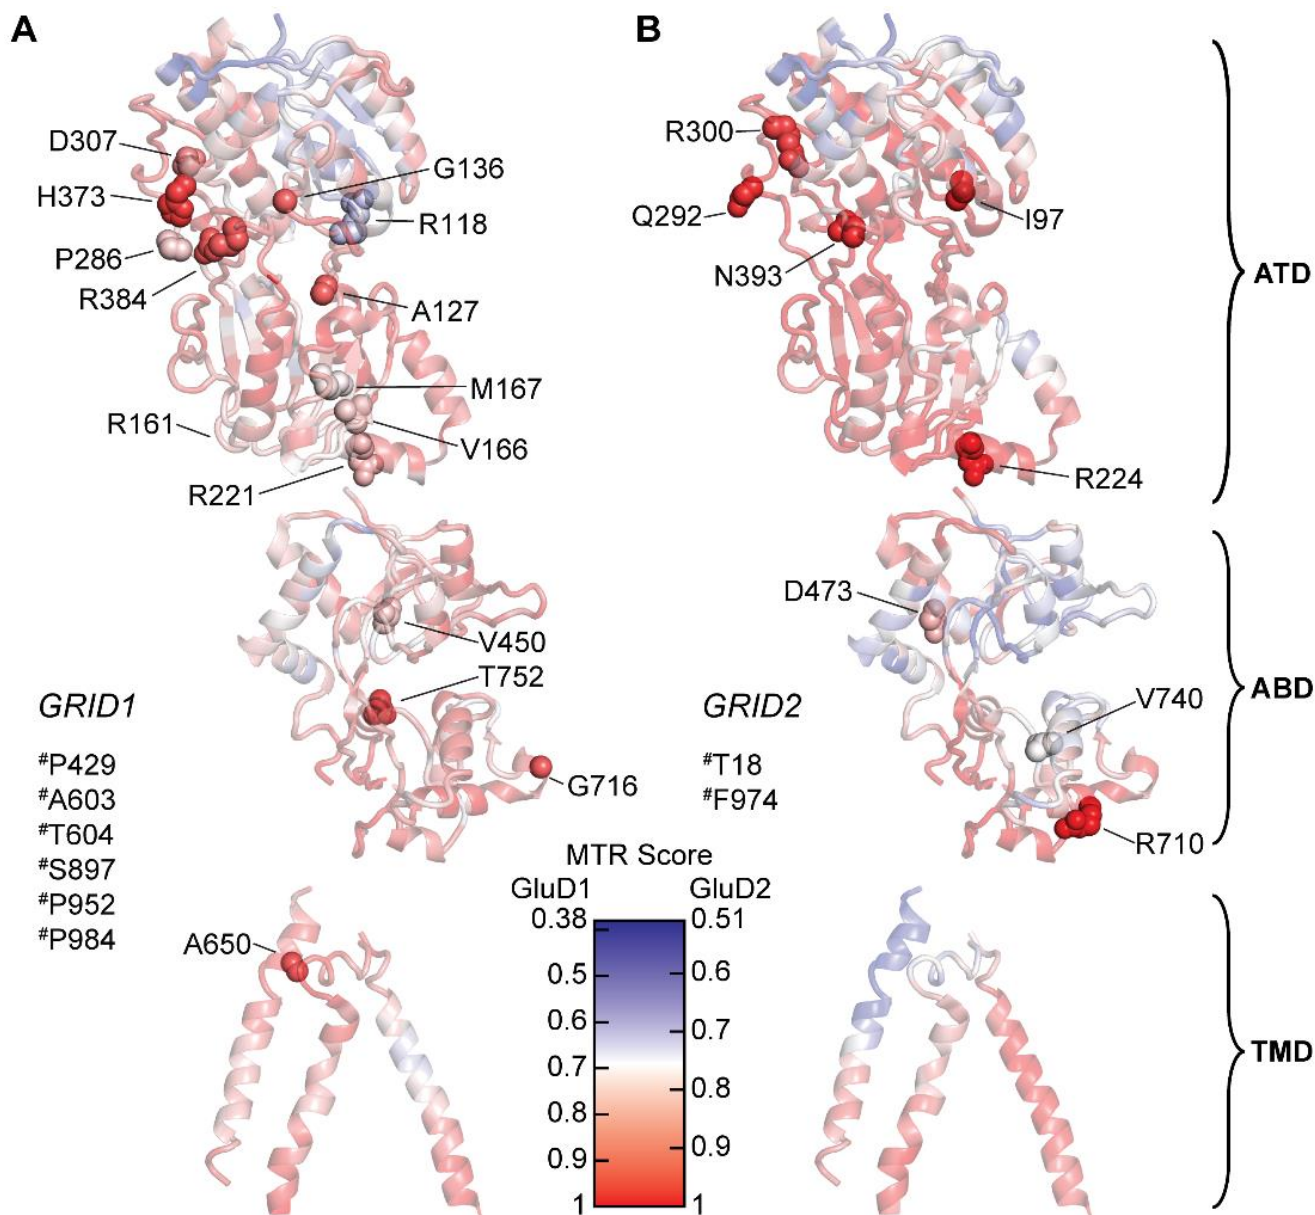

**Supplemental Figure S4. 3D MTR analysis of other *GRID1* and *GRID2* variants.** 3D MTR for missense variants in Supplemental Tables S2-S5 that were present in the gnomAD database are primarily localized in tolerant domains. 3D MTR scores were obtained using the GluD1 protein structure (Burada et al., 2020b) (PDB ID 6KSS). Lower scores (Blue) represent less tolerant residues, while higher scores (Red) represent more tolerant residues. **(A)** *GRID1* variants in context of *GRID1* 3D MTR scores. **(B)** *GRID2* variants in context of *GRID2* 3D MTR scores. # indicates missense variants in gnomAD that reside in regions of the receptor for which there is not clear electron density in the structure.

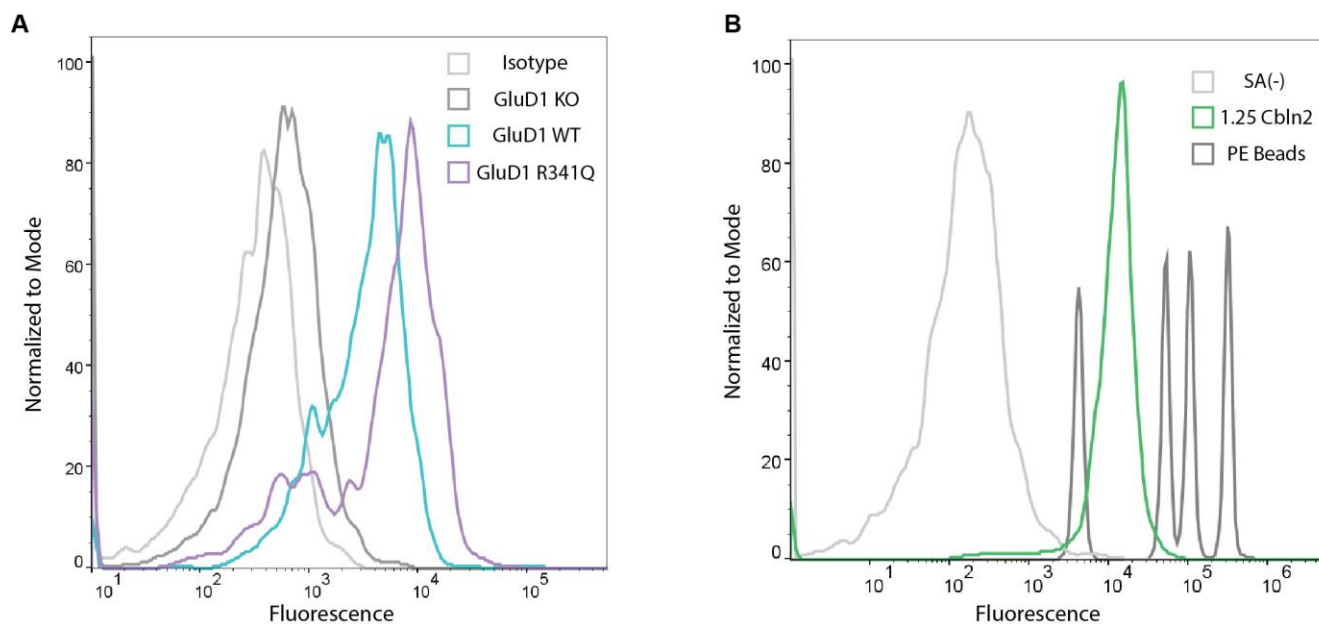

**Supplemental Figure S5. Flow cytometry validation of GluD1 and Cbln2 presence.**

(A) Normalized fluorescence histogram showing similar expression levels of the GluD1 between the WT and R341Q in transduced HEK cells, stained with primary rabbit anti-GluD1 antibody and secondary anti-rabbit AF647 antibody. GluD1 KO cells were stained the same way and the isotype control was for the rabbit anti-GluD1 antibody. (B) Beads coated with either 1.25  $\mu\text{g}/\text{mL}$  Cbln2 or 0  $\mu\text{g}/\text{mL}$  Cbln2 (SA(-) Ctrl) were stained with anti-HIS PE antibody to validate presence of Cbln2 on the bead used for making probes in the BFP adhesion frequency curve. BD science quantum PE calibration beads (PE beads) were flowed simultaneously for reference values.

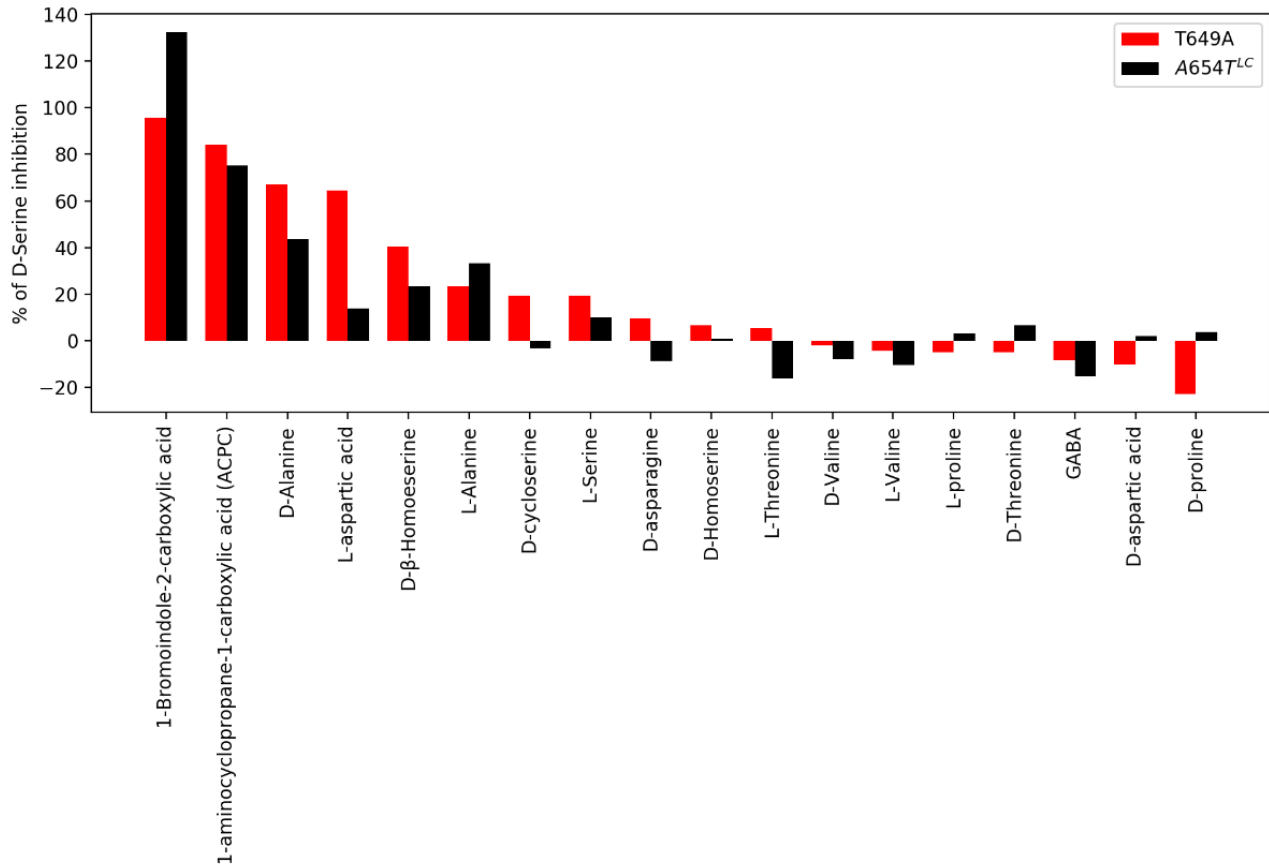

**Supplemental Figure S6. Single-concentration screen of compounds on GluD1-T649A and GluD2-A654T in oocytes.** All compound were tested at a concentration of 1 mM. Results are displayed as a percent of inhibition obtained with 1 mM D-serine in the same recording. 2 oocytes were tested for each compound and variant. GluD2-A654T<sup>LC</sup> indicates the missense variant in the *lurcher* mouse model.

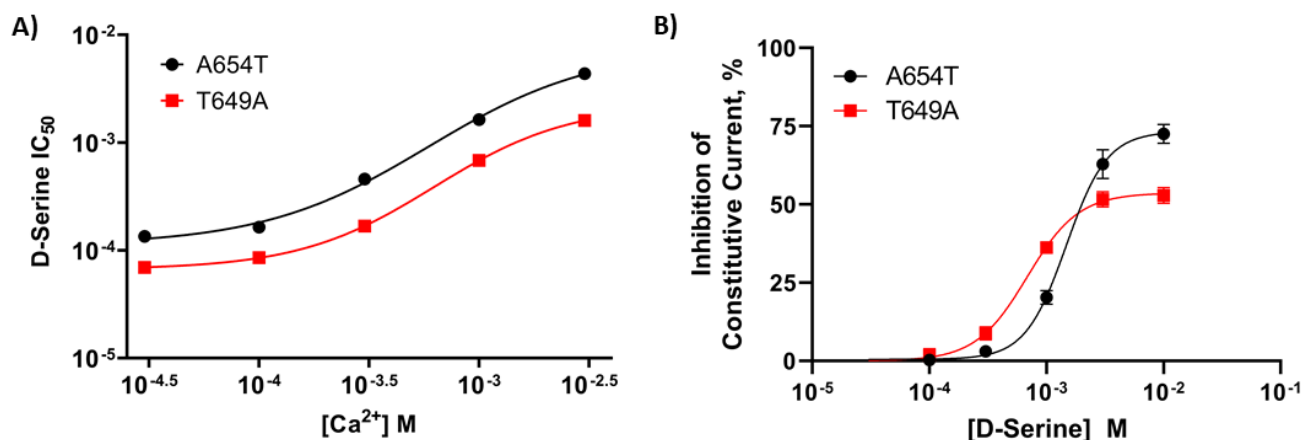

**Supplemental Figure S7. Allosteric interactions of D-serine and  $Ca^{2+}$  in GluD2-T649A.** (A)  $[Ca^{2+}]$  concentration vs D-serine  $IC_{50}$  is shown and fitted by the Hill equation. There is a relationship between  $Ca^{2+}$  concentration and the D-Serine  $IC_{50}$ , with D-serine being more potent at GluD2-T649A than at the *lurcher* mutation (GluD2-A654T) for all concentrations of extracellular  $Ca^{2+}$ . Fitted parameters for GluD2-A654T were  $Ca^{2+}$   $EC_{50}$  590  $\mu$ M, Hill slope 1.1, Minimum 110  $\mu$ M, Maximum 7500  $\mu$ M. Fitted parameters for GluD2-T649A were  $EC_{50}$  630  $\mu$ M, Hill slope 1.4, Minimum 66  $\mu$ M, Maximum 2300  $\mu$ M. (B) D-Serine concentration-response curve reveals that D-serine shows increased potency for GluD2-T649A in 1 mM  $Ca^{2+}$ . Fitted parameters for GluD2-A654T were D-serine  $EC_{50}$  1500  $\mu$ M, Hill slope 2.5, Maximum 73%. Fitted parameters for GluD2-T649A were D-serine  $EC_{50}$  690  $\mu$ M, Hill slope 2.0, Maximum 54%.

## References

- Ali, Z., Zulfiqar, S., Klar, J., Wikstrom, J., Ullah, F., Khan, A., Abdullah, U., Baig, S., Dahl, N. (2017). Homozygous GRID2 missense mutation predicts a shift in the D-serine binding domain of GluD2 in a case with generalized brain atrophy and unusual clinical features. *BMC Med Genet*, 18(1), 144.
- Burada, A. P., Vinnakota, R., & Kumar, J. (2020). Cryo-EM structures of the ionotropic glutamate receptor GluD1 reveal a non-swapped architecture. *Nat Struct Mol Biol*, 27(1), 84-91.
- Coutelier, M., Burglen, L., Mundwiler, E., Abada-Bendib, M., Rodriguez, D., Chantot-Bastaraud, S., Rougeot, C., Cournelle, M.A., Milh, M., Toutain, A., Bacq, D., Meyer, V., Afenjar, A., Deleuze, J.F., Brice, A., Héron, Stevanin, G., Durr, A. (2015). *GRID2* mutations span from congenital to mild adult-onset cerebellar ataxia. *Neurology*, 84(17), 1751-1759.
- Fogel, B. L., Lee, H., Deignan, J. L., Strom, S. P., Kantarci, S., Wang, X., Quintero-Rivera, F., Vilain, E., Grody, W. W., Perlman, S., Geschwind, D. H., & Nelson, S. F. (2014). Exome sequencing in the clinical diagnosis of sporadic or familial cerebellar ataxia. *JAMA neurology*, 71(10), 1237–1246.
- Hills, L. B., Masri, A., Konno, K., Kakegawa, W., Lam, A. T., Lim-Melia, E., Chandy, N., Hill, R.S., Partlow, J.N., Al-Saffar, M., Nasir, R., Stoler, J.M., Barkovich, A.J., Watanabe, M., Yuzaki, M., Mochida, G. H. (2013). Deletions in *GRID2* lead to a recessive syndrome of cerebellar ataxia and tonic upgaze in humans. *Neurology* 81(16), 1378-1386.
- Kushima, I., Aleksic, B., Nakatochi, M., Shimamura, T., Okada, T., Uno, Y., Morikawa, M., Ishizuka, K., Shiino, T., Kimura, H., Arioka, Y., Yoshimi, A., Takasaki, Y., Yu, Y., Nakamura, Y., Yamamoto, M., Iidaka, T., Iritani, S., Inada, T., Ogawa, N., ... Ozaki, N. (2018). Comparative Analyses of Copy-Number Variation in Autism Spectrum Disorder and Schizophrenia Reveal Etiological Overlap and Biological Insights. *Cell Reports*, 24(11), 2838-2856.
- Maier, A., Klopocki, E., Horn, D., Tzschach, A., Holm, T., Meyer, R., & Meyer, T. (2014). De novo partial deletion in *GRID2* presenting with complicated spastic paraplegia. *Muscle & nerve*, 49(2), 289–292.
- Petrovski, S., Wang, Q., Heinzen, E.L., Allen, A.S., Goldstein, D.B. (2013) Genic intolerance to functional variation and the interpretation of personal genomes. *PLoS Genet*. 9(8):e1003709.
- Taghdiri, M., Kashaf, A., Abbassi, G., Moshtagh, A., Sadatian, N., Fardaei, M., Najafi, K., & Kariminejad, R. (2019). Further delineation of the phenotype caused by a novel large homozygous deletion of *GRID2* gene in an adult patient. *Clinical case reports*, 7(6), 1149-1153.
- Ung, D.C., Tricoire, L., Pietrancosta, N., Zlatanovic, A., Pode-Shakked, B., Raas-Rothschild, A., Elpeleg, O., Abu-Libdeh, B., Hamed, N., Papon, M-A, Marouillat, S., Thepault, R-A, Stevanin, G., Lambalez, B., Toutain, A., Hepp, R., Laumonnier, F. (2022) *GRID1/GluD1* homozygous variants linked to intellectual disability and spastic paraplegia impair mGlu1/5 receptor signaling and excitatory synapses. medRxiv, <https://doi.org/10.1101/2022.05.16.22274994>
- Utine, G. E., Haliloğlu, G., Salanci, B., Çetinkaya, A., Kiper, P. Ö., Alanay, Y., Aktas, D., Boduroğlu, K., & Alikasıfoğlu, M. (2013). A homozygous deletion in *GRID2* causes a human phenotype with cerebellar ataxia and atrophy. *J Child Neurol*, 28(7), 926-932.

- Van Schil, K., Meire, F., Karlstetter, M., Bauwens, M., Verdin, H., Coppieters, F., Scheiffert, E., Van Nechel, C., Langmann, T., Deconinck, N., & De Baere, E. (2015). Early-onset autosomal recessive cerebellar ataxia associated with retinal dystrophy: new human hotfoot phenotype caused by homozygous *GRID2* deletion. *Genetics in Medicine*, 17(4), 291-299.
- Veerapandiyan, A., Enner, S., Thulasi, V., & Ming, X. (2017) A Rare Syndrome of *GRID2* Deletion in 2 Siblings. *Child Neurol Open*, 4: 1-3
